# Supplementary material
Source: Royal Society of Chemistry journal article supplement (doi:10.1039/d6cp01039c)
Supplement: d6cp01039c1.pdf [file d6cp01039c1.pdf]

## Mechanism of glass transition temperature enhancement in multicomponent epoxy resins incorporating triazine rings

Yuuki Kinugawa,<sup>a</sup> Yoshiaki Kawagoe,<sup>\*b</sup> Keigo Matsumoto,<sup>c</sup> Masashi Ohno,<sup>c</sup> Shoko Mishima,<sup>a</sup> Takahiko Kawai,<sup>b</sup> and Tomonaga Okabe<sup>a,d,e</sup>

<sup>a</sup> Department of Aerospace Engineering, Tohoku University, 6-6-01, Aoba, Aramaki, Aoba-ku, Sendai, Miyagi 980-8579, Japan.

<sup>b</sup> Research Center for Green X-Tech, 6-6-11, Aoba, Aramaki, Aoba-ku, Sendai, Miyagi, 980-8579, Japan.

<sup>c</sup> Chemical Research Laboratories, Nissan Chemical Corporation, 10-1, Tsuboi-Nishi 2-chome, Funabashi, Chiba 274-8507, Japan.

<sup>d</sup> Department of Materials Science and Engineering, University of Washington, BOX 352120, Seattle, WA 98195-1750, USA.

<sup>e</sup> Research Center for Structural Materials, Polymer Matrix Hybrid Composite Materials Group, National Institute for Materials Science, 1-2-1 Sengen, Tsukuba, Ibaraki 305-0047, Japan.

\*E-mail: kawagoe@tohoku.ac.jp

### 1 Origin of the low-angle scattering peak

In the WAXS patterns, peak 1 shifts toward lower scattering angles as the TEPIC content increases. This peak has also been observed in single-component epoxy systems, such as DGEBA–diaminodiethylamine [1,2]. It has been reported that this peak originates from the emergence of periodicity among epoxy monomers or curing agents during curing [3,4]. To elucidate the origin of peak 1, this study focused on the crosslinked structure of the 0 wt% system without TEPIC. Figure S1 shows the distance distribution between the sulfur atoms of the 4,4'-DDS units bonded to both ends of DGEBA in the 0 wt% formulation. The S-S distance is most frequently distributed around 17–18 Å. Considering that this peak emerges as a result of the curing reaction and that the sulfone group in 4,4'-DDS is expected to have the highest electron density, it is reasonable to attribute this peak to the distance between the sulfur atoms of the 4,4'-DDS molecules connected to both ends of DGEBA. In addition, the apparent shift of this peak toward lower scattering angles with increasing TEPIC content may be attributed to the emergence of an additional peak, originating from structural inhomogeneities observed by DMA or from 4,4'-DDS aggregation. The overlap of this contribution with peak 1 could make the peak position appear to shift.

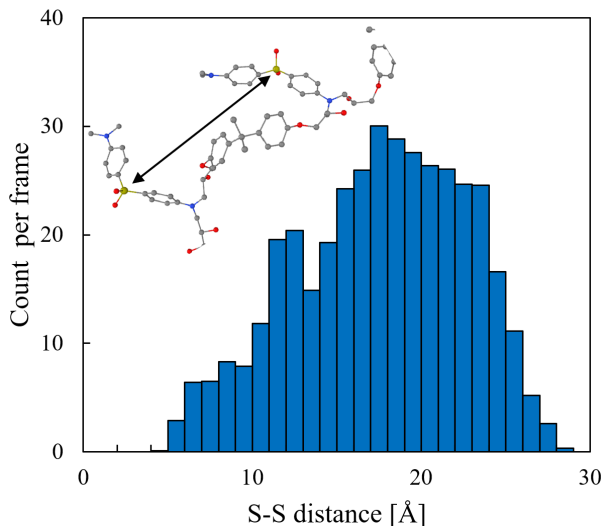

Fig. S1: Distance distribution between the sulfur atoms of the 4,4'-DDS units bonded to both ends of DGEBA in DGEBA/4,4'-DDS

## 2 Configurations of $\pi-\pi$ stacking

Figure S2 shows a visualization of the local ring structures identified as being in a stacked state based on the MD simulations. In both benzene–benzene and benzene–triazine pairs, stacking is observed for both intramolecular and intermolecular configurations. In contrast, the distribution of the center-of-mass distances for stacked pairs shown in Figure 9 does not exhibit a single well-defined peak. This may be because intramolecular and intermolecular stacking experience different constraints and steric hindrance from surrounding atoms, leading to different preferred equilibrium distances, which are superimposed in the observed distribution.

Figure S3 shows the configurations of  $\pi-\pi$  stacking calculated by quantum-chemical calculations. Benzene–benzene stacking adopts a slipped configuration, whereas benzene–triazine stacking forms a face-to-face configuration.

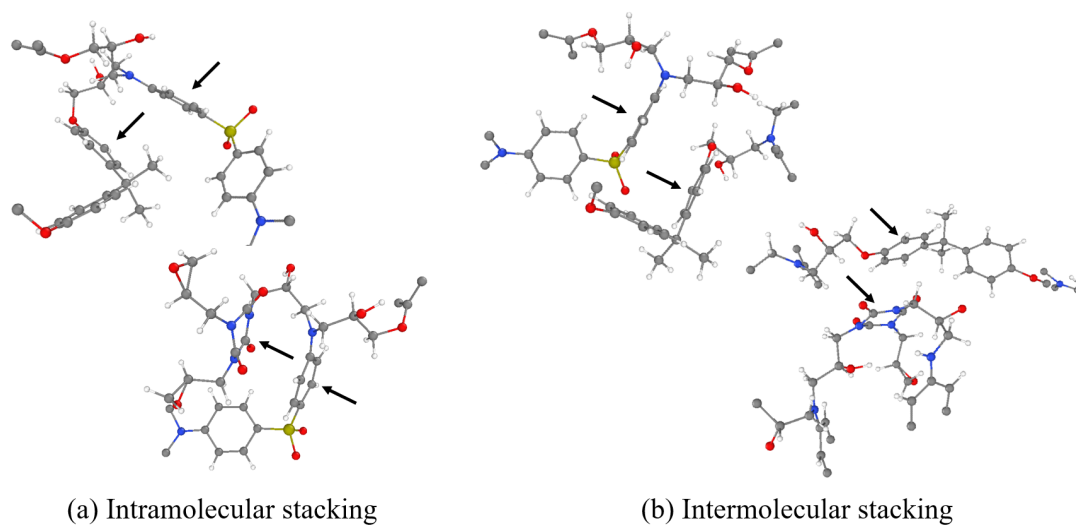

Fig. S2: Visualization of stacking configurations determined by MD simulation. C atoms are shown in grey, N atoms in blue, S atoms in yellow, O atoms in red, and H atoms in white. The arrow indicates stacked rings.

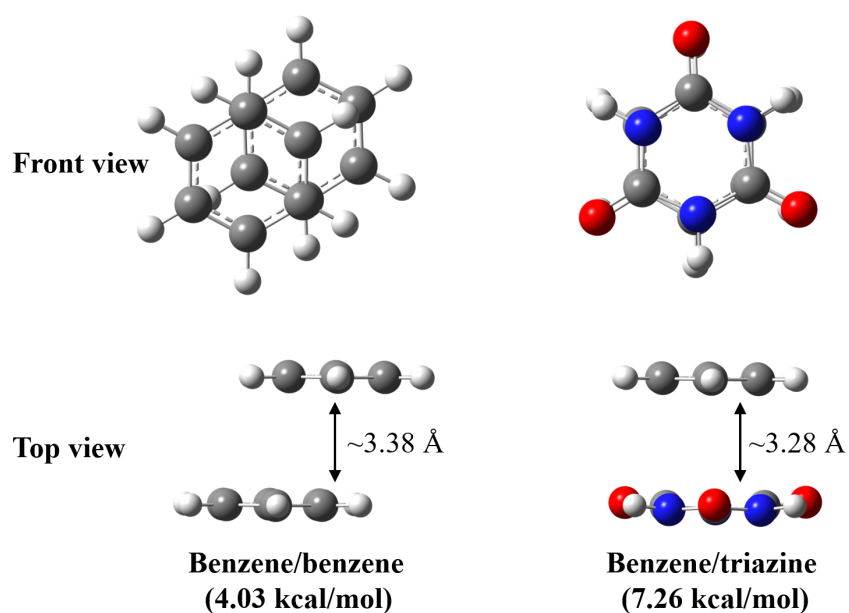

Fig. S3: Configurations of  $\pi$ - $\pi$  stacking calculated by quantum-chemical calculations.

## References

- [1] Yoshiaki Kawagoe, Gota Kikugawa, Keiichi Shirasu, and Tomonaga Okabe. Thermoset resin curing simulation using quantum-chemical reaction path calculation and dissipative particle dynamics. *Soft Matter*, 17:6707–6717, 7 2021.
- [2] King-Fu Lin, Wen-Yung Shu, and Tain-Luen Wey. Organotransition-metal complexes as additives for epoxy resins: 1. their effects on toughness and morphology of epoxy resins. *Polymer*, 34(2):277–288, 1993.
- [3] Hiroki Ogawa, Mika Aoki, Shunsuke Ono, Yuki Watanabe, Satoru Yamamoto, Keiji Tanaka, and Mikihiro Takenaka. Spatial distribution of the network structure in epoxy resin via the maxs-ct method. *Langmuir*, 38:11432–11439, 9 2022.
- [4] Derek B. Dwyer, Sara Isbill, Zachary E. Brubaker, Jong K. Keum, Wim Bras, and Jennifer L. Niedziela. Thermally induced structural transitions in epoxy thermoset polymer networks and their spectroscopic responses. *ACS Applied Polymer Materials*, 5:5961–5971, 8 2023.
